# Supplementary material
Source: MDPI journal article supplement (https://www.mdpi.com/2227-9040/10/5/185)
Supplement: s1 [file s1]

Supplementary Materials

# Cyanide Anion Determination Based on Nucleophilic Addition to 6-[(*E*)-(4-Nitrophenyl)diazenyl]-1',3,3',4-tetrahydrospiro[chromene-2,2'-indole] Derivatives

Miglė Dagilienė <sup>1</sup>, Giedrė Markuckaitė <sup>2</sup>, Sonata Krikštolaitytė <sup>2</sup>, Algirdas Šačkus <sup>1</sup> and Vytas Martynaitis <sup>2,\*</sup>

<sup>1</sup> Institute of Synthetic Chemistry, Kaunas University of Technology, K. Baršausko g. 59, LT-51423 Kaunas, Lithuania; migle.burinskaite@ktu.lt (M.D.); algirdas.sackus@ktu.lt (A.Š.)

<sup>2</sup> Department of Organic Chemistry, Kaunas University of Technology, Radvilėnų pl. 19, LT-50254 Kaunas, Lithuania; markuckaite.giedre@gmail.com (G.M.); sonata.krikstolaityte@ktu.lt (S.K.)

\* Correspondence: vytas.martynaitis@ktu.lt; Tel.: +370-616-33645

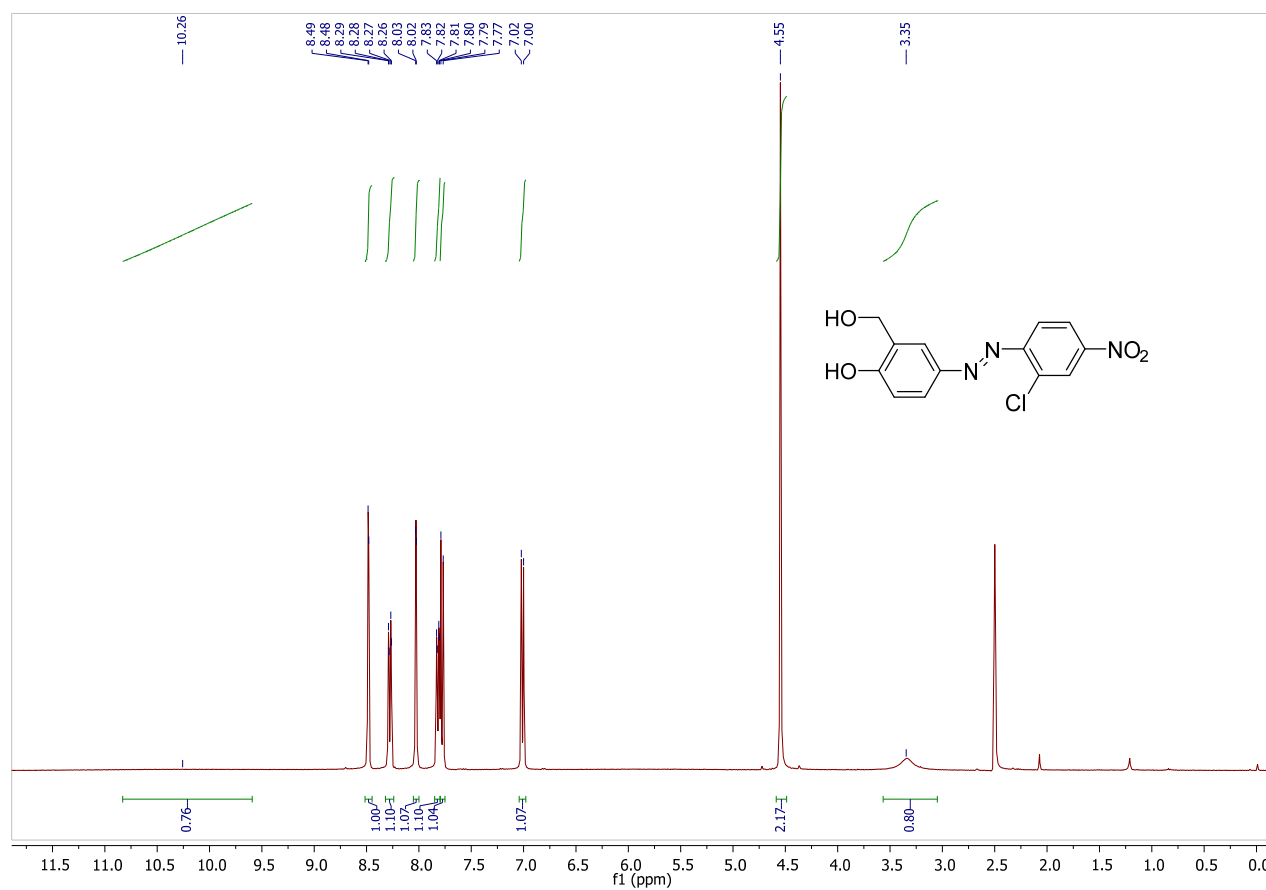

**Figure S1.** <sup>1</sup>H NMR spectra of 4-[(*E*)-2-Chloro-4'-nitrophenyl]diazenyl-2-hydroxymethylphenol (3b). (DMSO).

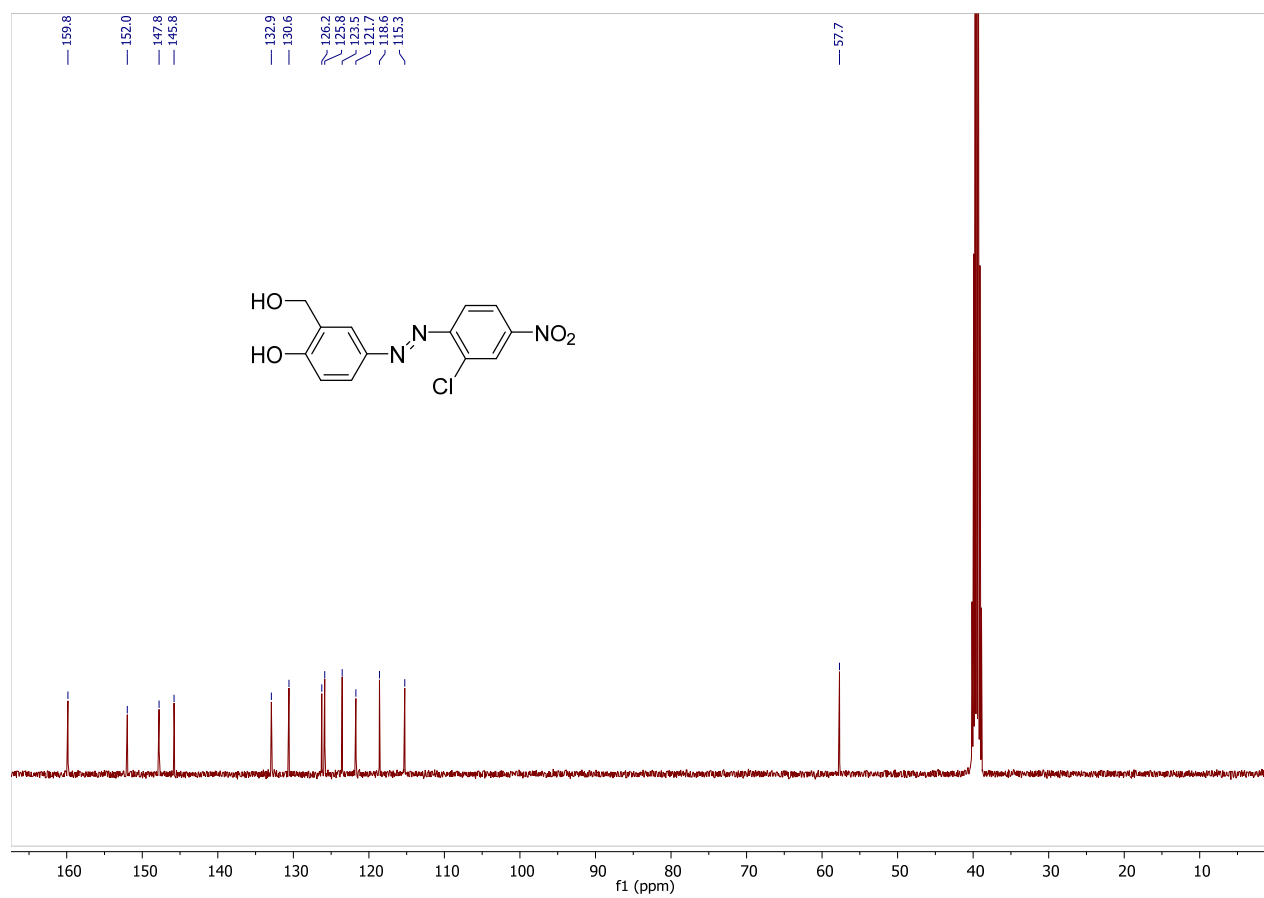

**Figure S2.**  $^{13}\text{C}$  NMR spectra of 4-[(*E*)-2-Chloro-4'-nitrophenyl]diazenyl-2-hydroxymethylphenol (3b). (DMSO).

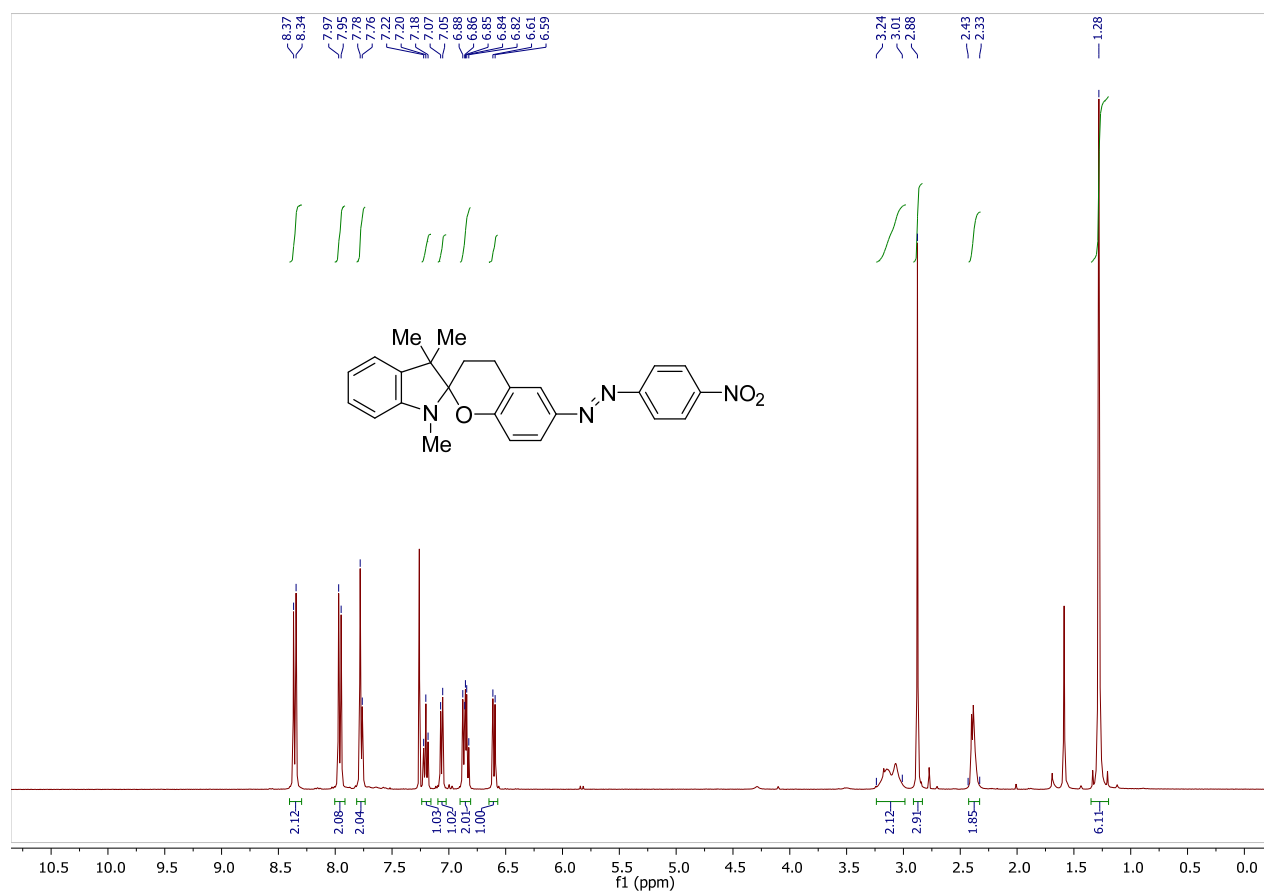

**Figure S3.** <sup>1</sup>H NMR spectra of 1',3',3'-Trimethyl-6-[(E)-(4-nitrophenyl)diazenyl]-1,3,3',4-tetrahydrospiro[chromene-2,2'-indole] (7a). (CDCl<sub>3</sub>).

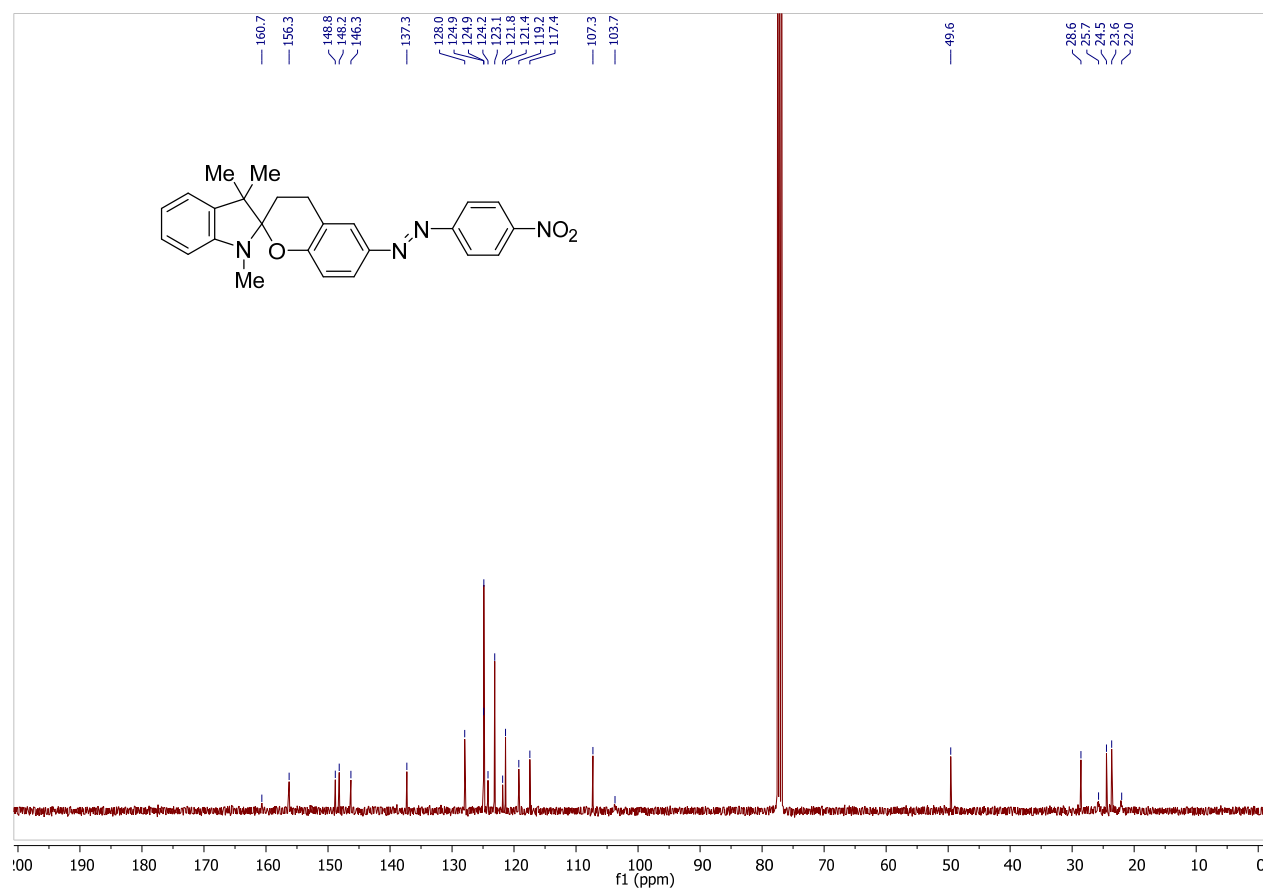

**Figure S4.**  $^{13}\text{C}$  NMR spectra of 1',3',3'-Trimethyl-6-[(*E*)-(4-nitrophenyl)diazenyl]-1,3,3',4-tetrahydrospiro[chromene-2,2'-indole] (7a). ( $\text{CDCl}_3$ ).

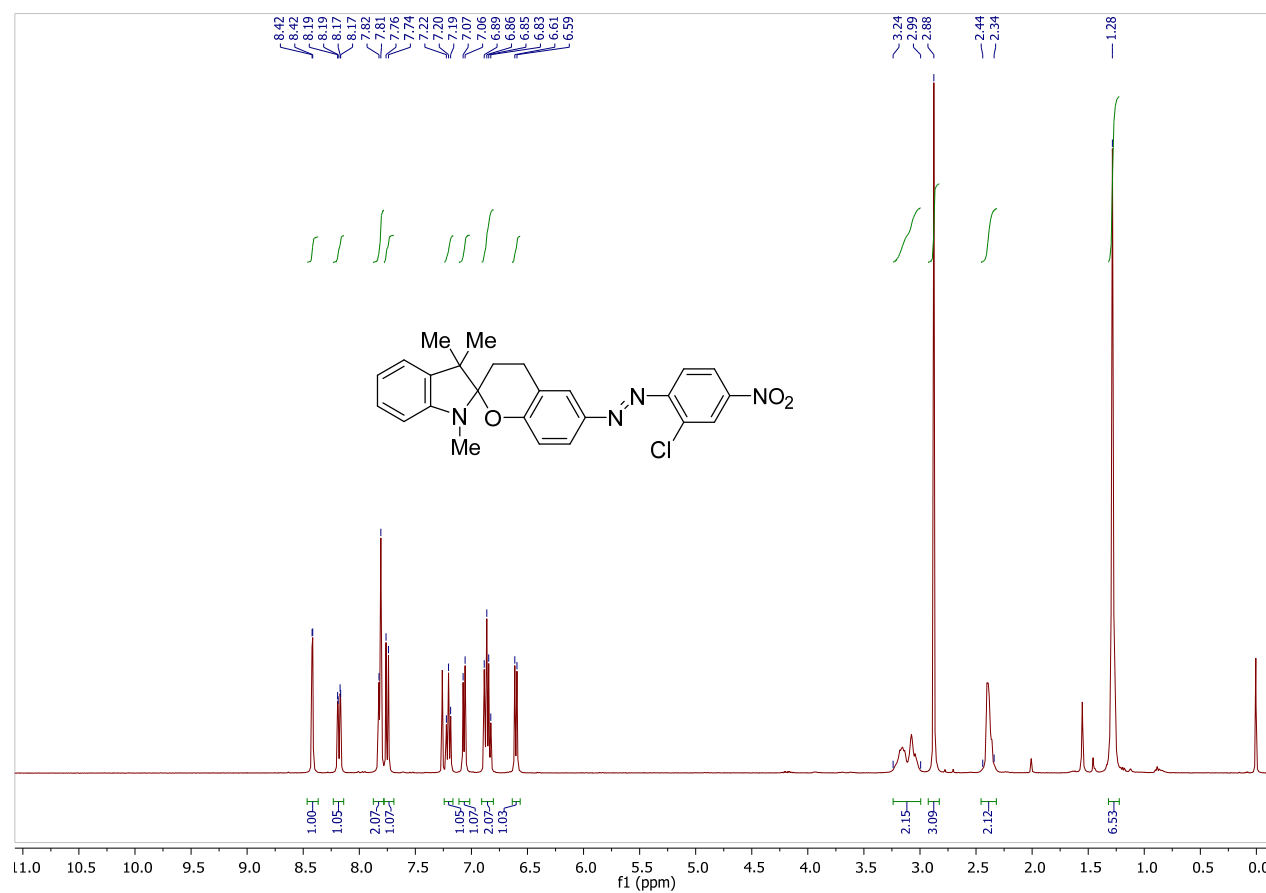

**Figure S5.** <sup>1</sup>H NMR spectra of (6-[(*E*)-(2-Chloro-4-nitrophenyl)diazenyl]-1',3',3'-trimethyl-1',3,3',4-tetrahydrospiro[chromene-2,2'-indole] (**7b**). CDCl<sub>3</sub>).

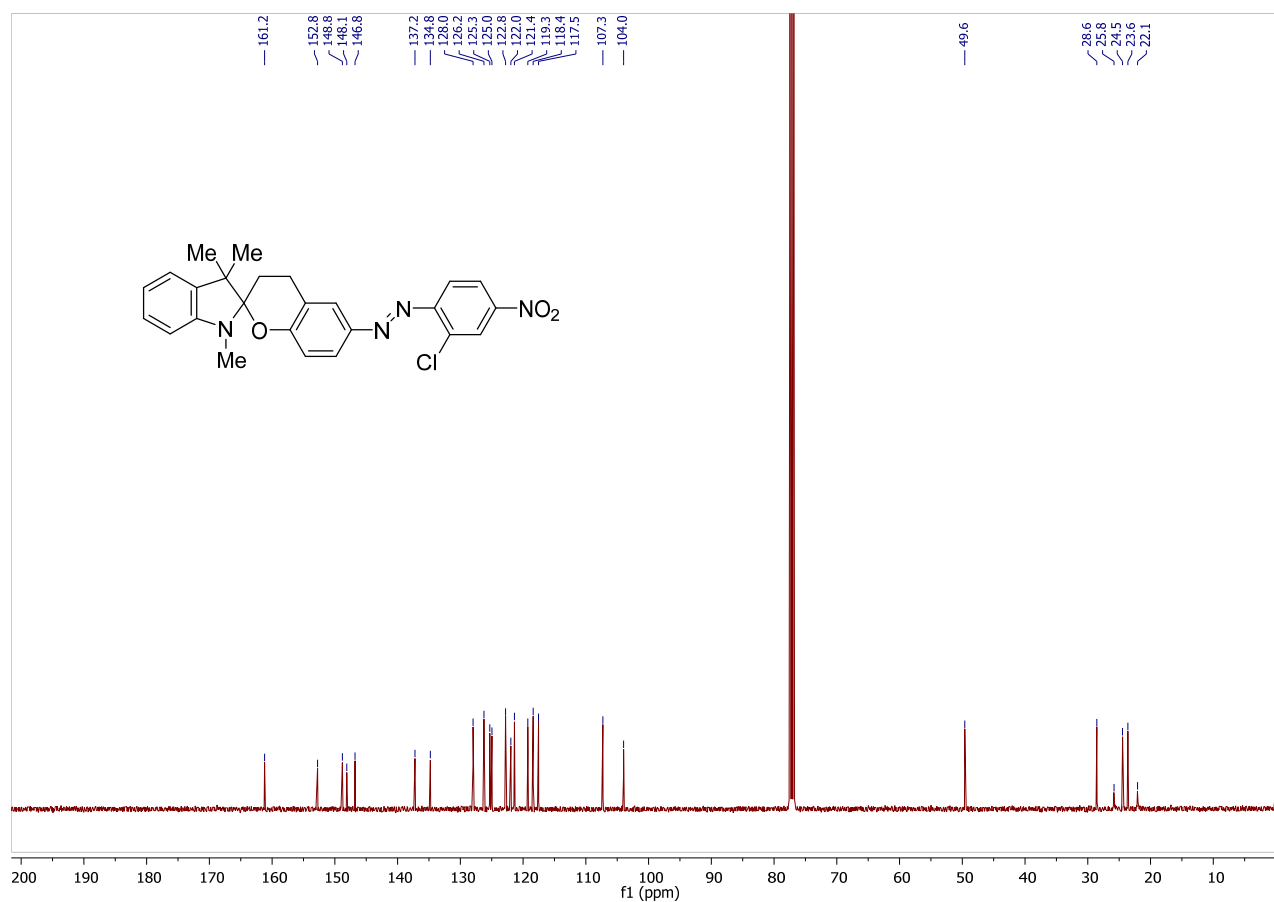

**Figure S6.** <sup>13</sup>C NMR spectra of 6-[(*E*)-(2-Chloro-4-nitrophenyl)diazenyl]-1',3',3'-trimethyl-1',3,3',4-tetrahydrospiro[chromene-2,2'-indole] (**7b**). (CDCl<sub>3</sub>).

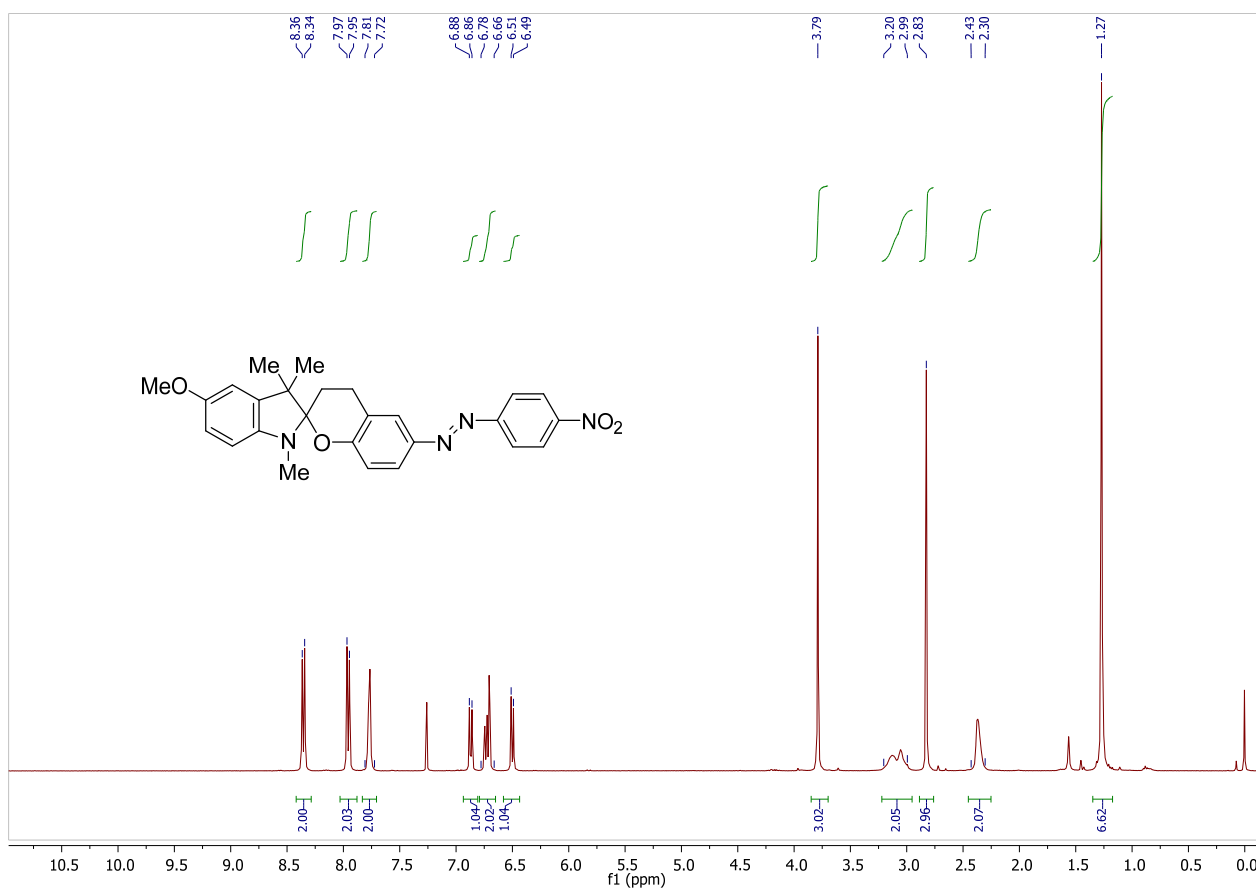

**Figure S7.** <sup>1</sup>H NMR spectra of 5-Methoxy-1,3,3'-trimethyl-[(E)-(4-nitrophenyl)diazenyl]-1,3,3',4-tetrahydrospiro[chromene-2,2'-indole] (7c). (CDCl<sub>3</sub>).



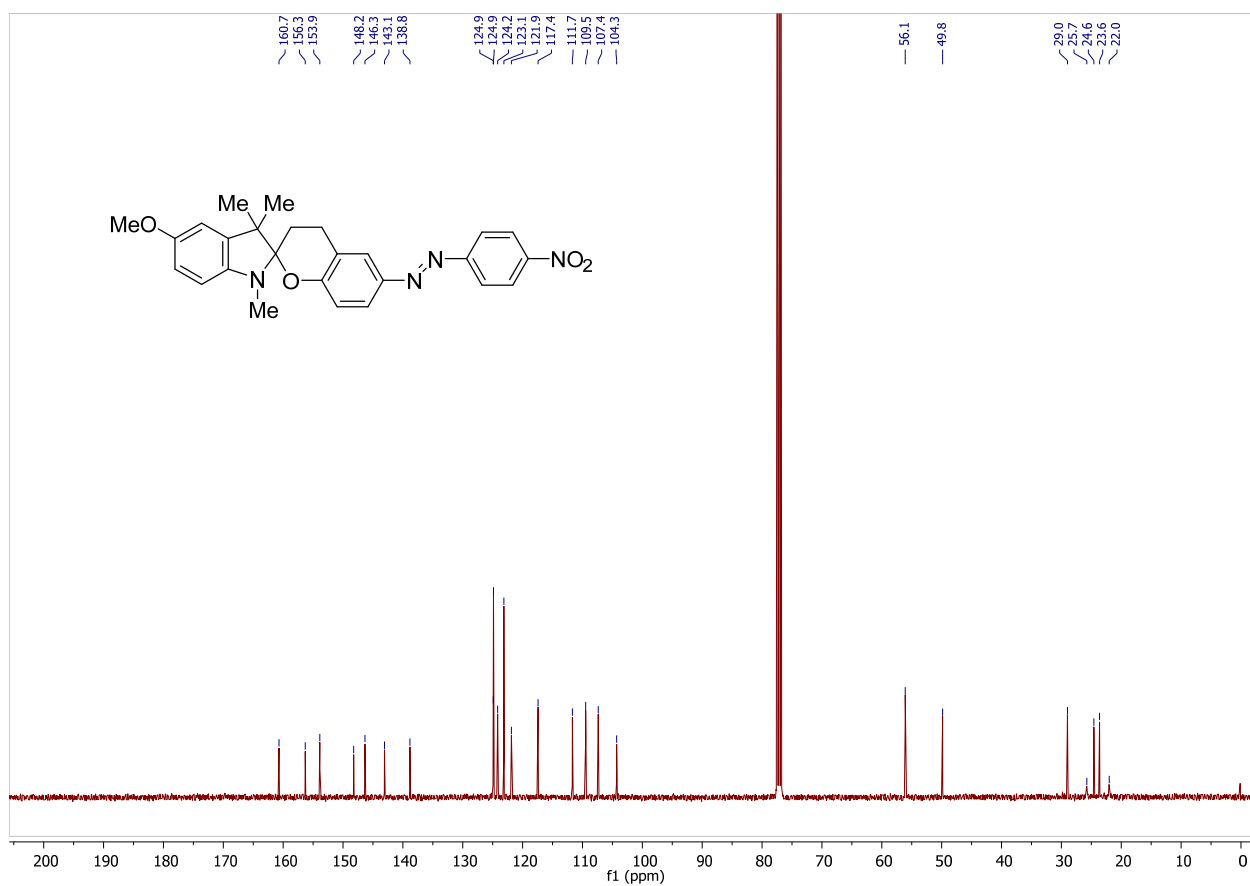

**Figure S8.** <sup>13</sup>C NMR spectra of 5'-Methoxy-1',3',3'-trimethyl-6-[(E)-(4-nitrophenyl)diazenyl]-1',3,3',4-tetrahydrospiro[chromene-2,2'-indole] (7c). (CDCl<sub>3</sub>).

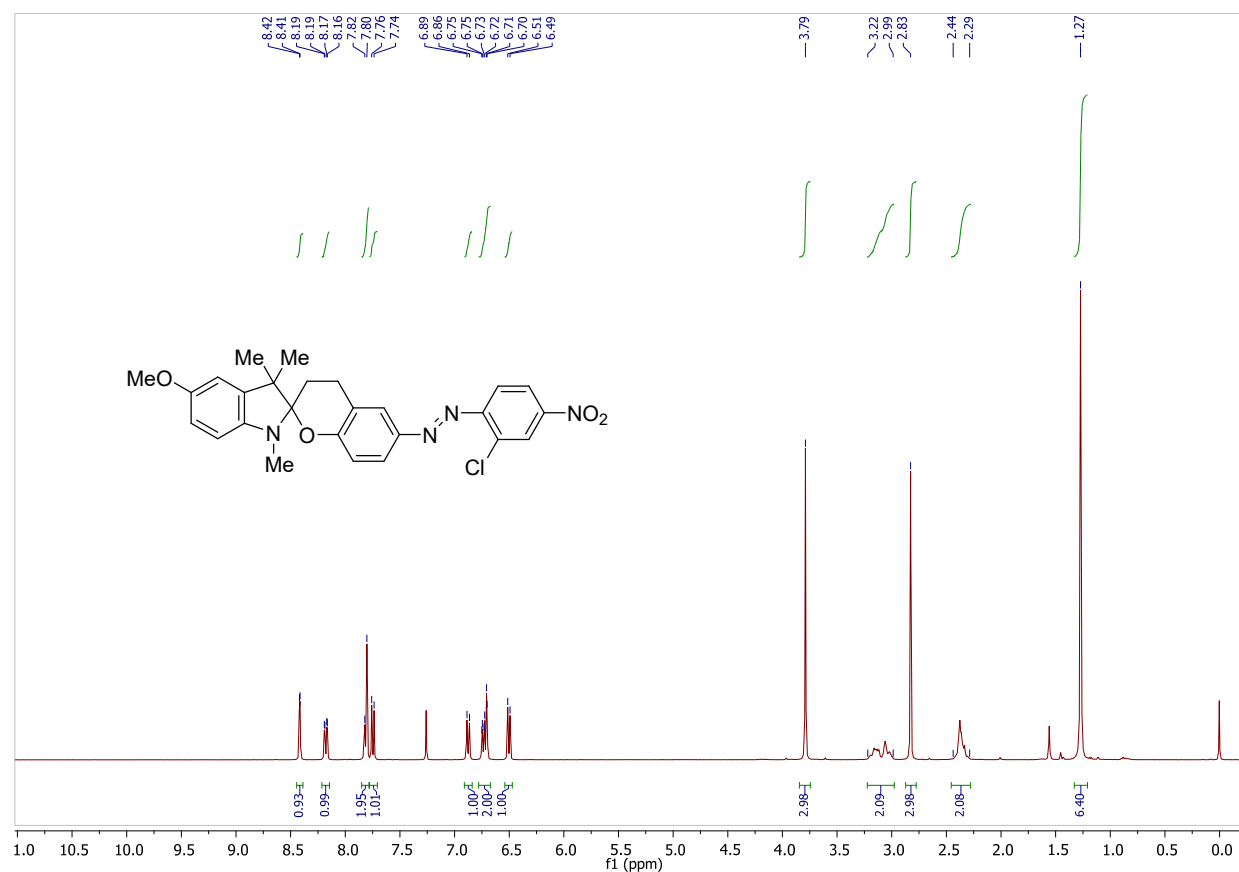

**Figure S9.** <sup>1</sup>H NMR spectra of 6-[(*E*)-(2-chloro-4-nitrophenyl)diazenyl]-5'-methoxy-1',3',3'-trimethyl-1,3,3',4-tetrahydrospiro[chromene-2,2'-indole] (**7d**). (CDCl<sub>3</sub>).

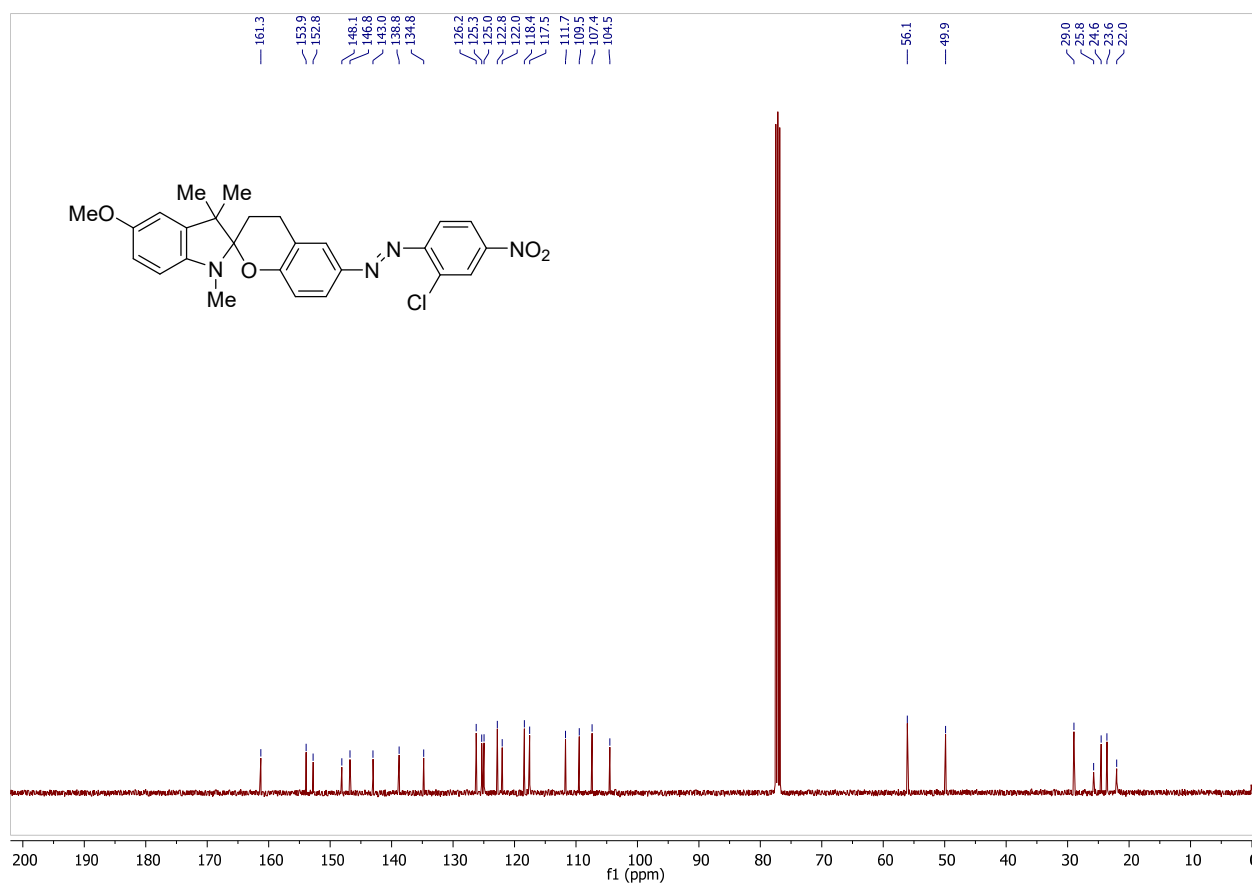

**Figure S10.**  $^{13}\text{C}$  NMR spectra of 6-[(*E*)-(2-chloro-4-nitrophenyl)diazenyl]-5'-methoxy-1',3',3'-trimethyl-1,3,3',4-tetrahydrospiro[chromene-2,2'-indole] (**7d**). ( $\text{CDCl}_3$ ).

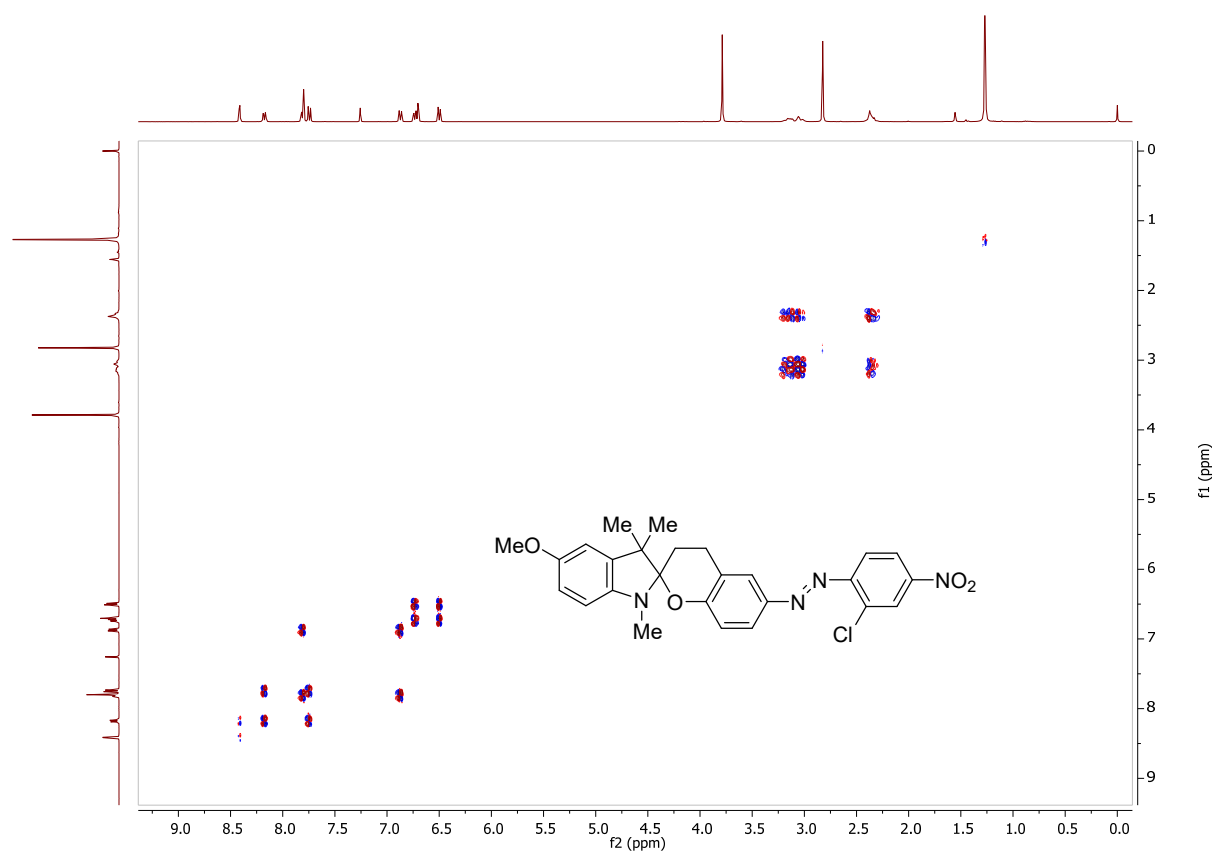

**Figure S11.**  $^1\text{H}$ - $^1\text{H}$  COSY NMR spectra of 6-[(E)-(2-chloro-4-nitrophenyl)diazenyl]-5'-methoxy-1',3',3'-trimethyl-1,3,3',4-tetrahydrospiro[chromene-2,2'-indole] (**7d**). ( $\text{CDCl}_3$ ).

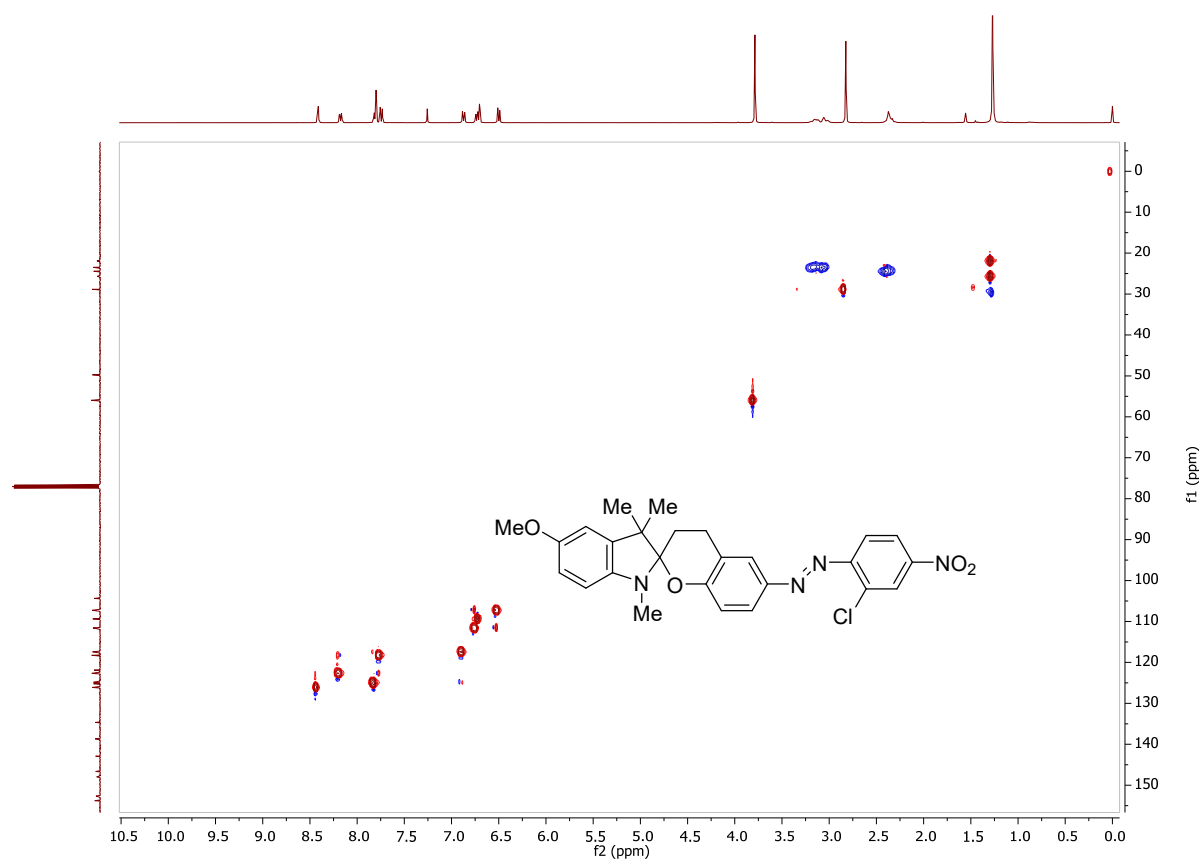

**Figure S12.** <sup>1</sup>H-<sup>13</sup>C HSQC NMR spectra of 6-[(*E*)-(2-Chloro-4-nitrophenyl)diazenyl]-5'-methoxy-1',3',3'-trimethyl-1,3,3',4-tetrahydrospiro[chromene-2,2'-indole] (**7d**). (CDCl<sub>3</sub>).

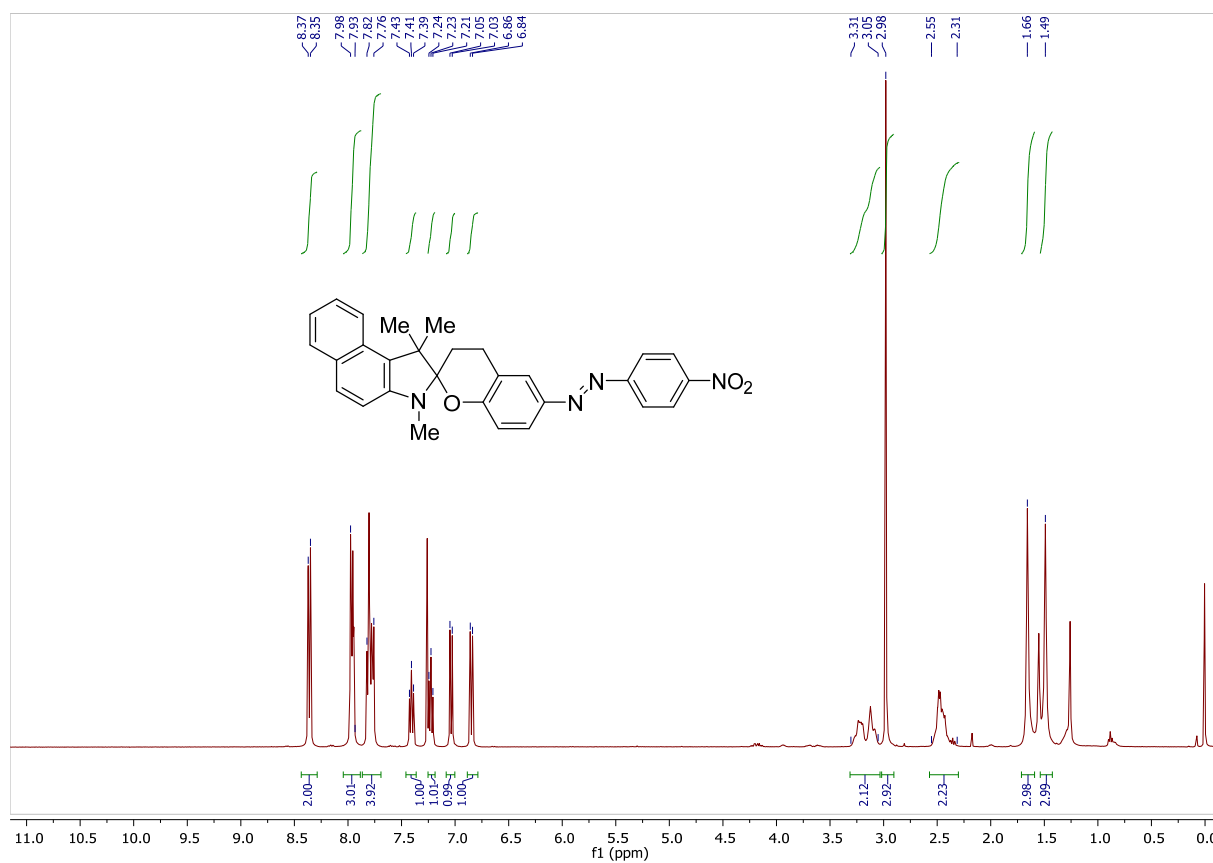

**Figure S13.** <sup>1</sup>H NMR spectra of 1',1',3'-Trimethyl-6-[(*E*)-4-(nitrophenyl)diazenyl]-1,3,3',4-tetrahydrospiro[chromene-2,2'-benz[e][2H]indole] (**7e**). (CDCl<sub>3</sub>).

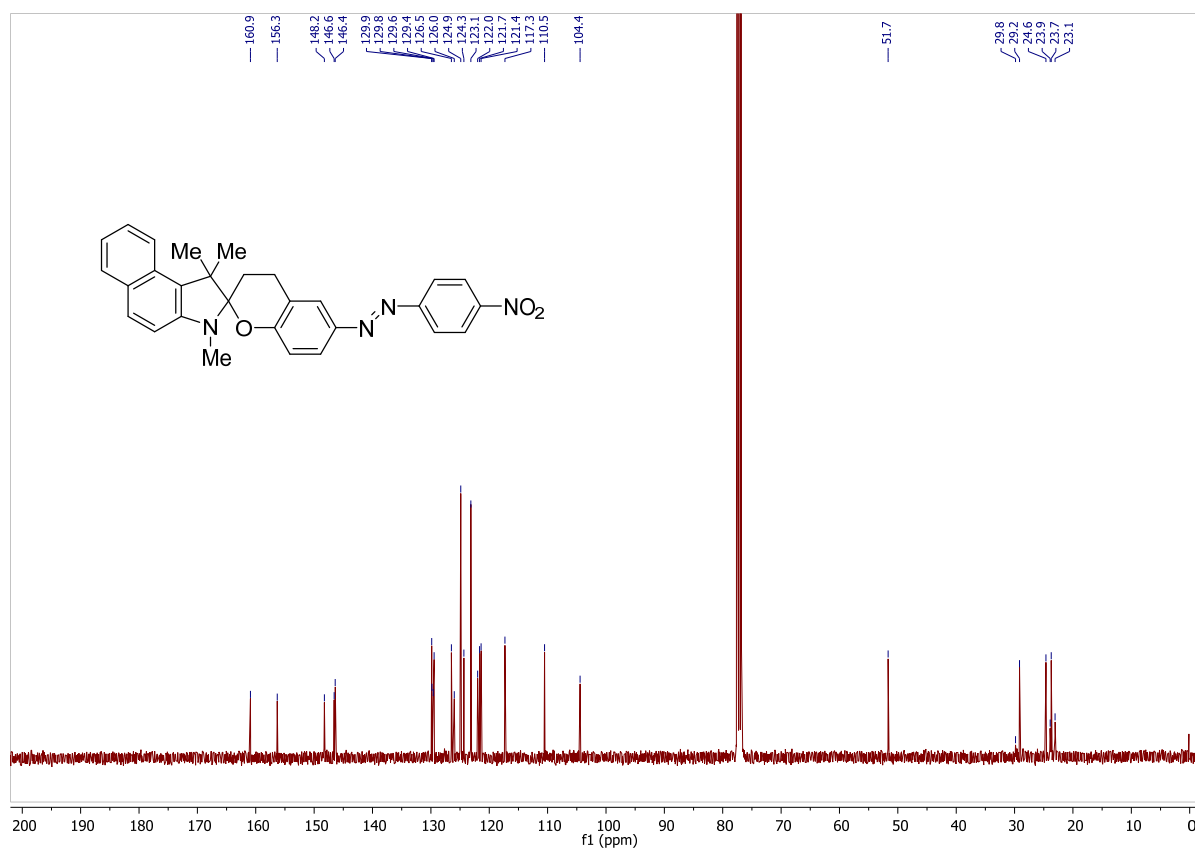

**Figure S14.**  $^{13}\text{C}$  NMR spectra of 1',1',3'-Trimethyl-6-[(*E*)-4-(nitrophenyl)diazenyl]-1,3,3',4'-tetrahydrospiro[chromene-2,2'-benz[e][2H]indole] (**7e**). ( $\text{CDCl}_3$ ).

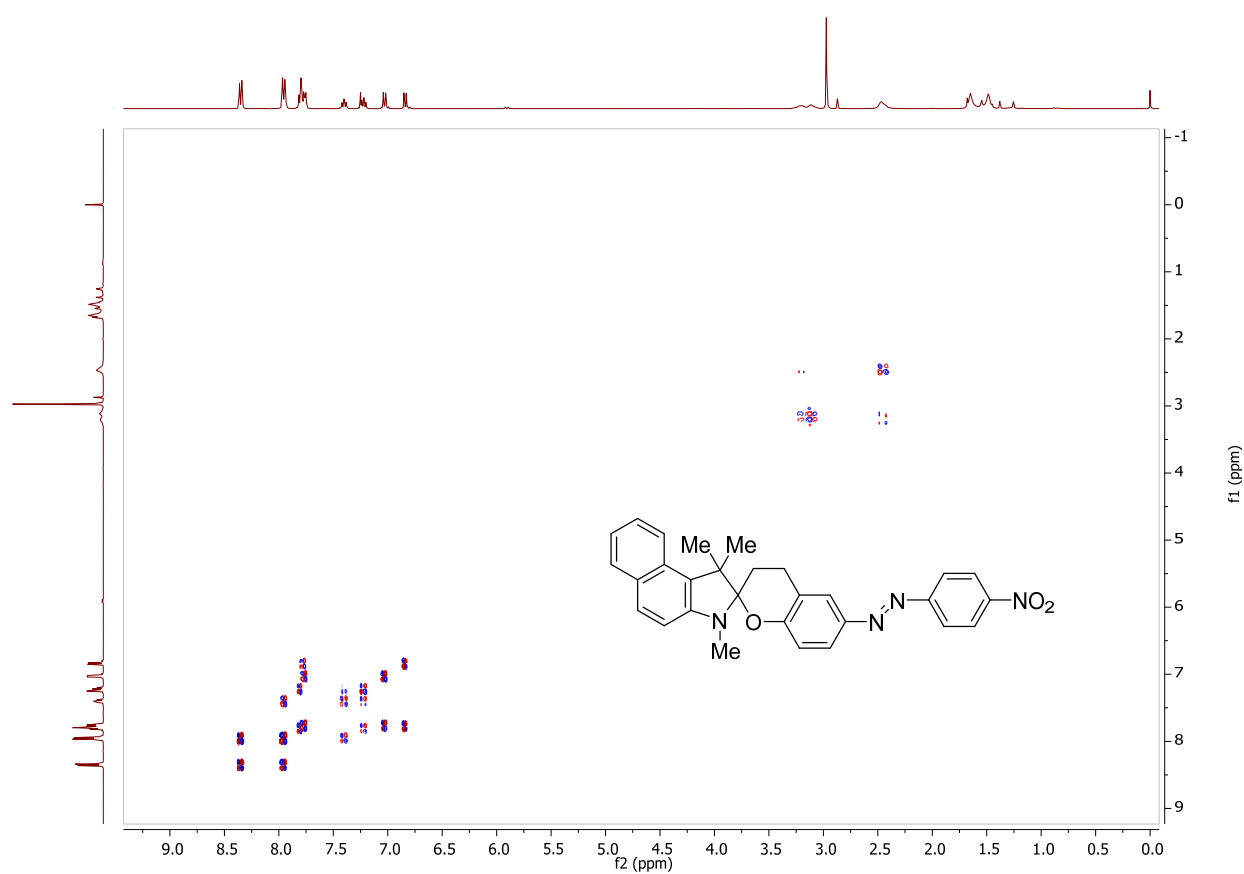

**Figure S15.**  $^1\text{H}$ - $^1\text{H}$  COSY NMR spectra of 1',1',3'-Trimethyl-6-[(*E*)-4-(nitrophenyl)diazenyl]-1',3,3',4-tetrahydrospiro[chromene-2,2'-benz[e][2H]indole] (**7e**). ( $\text{CDCl}_3$ ).



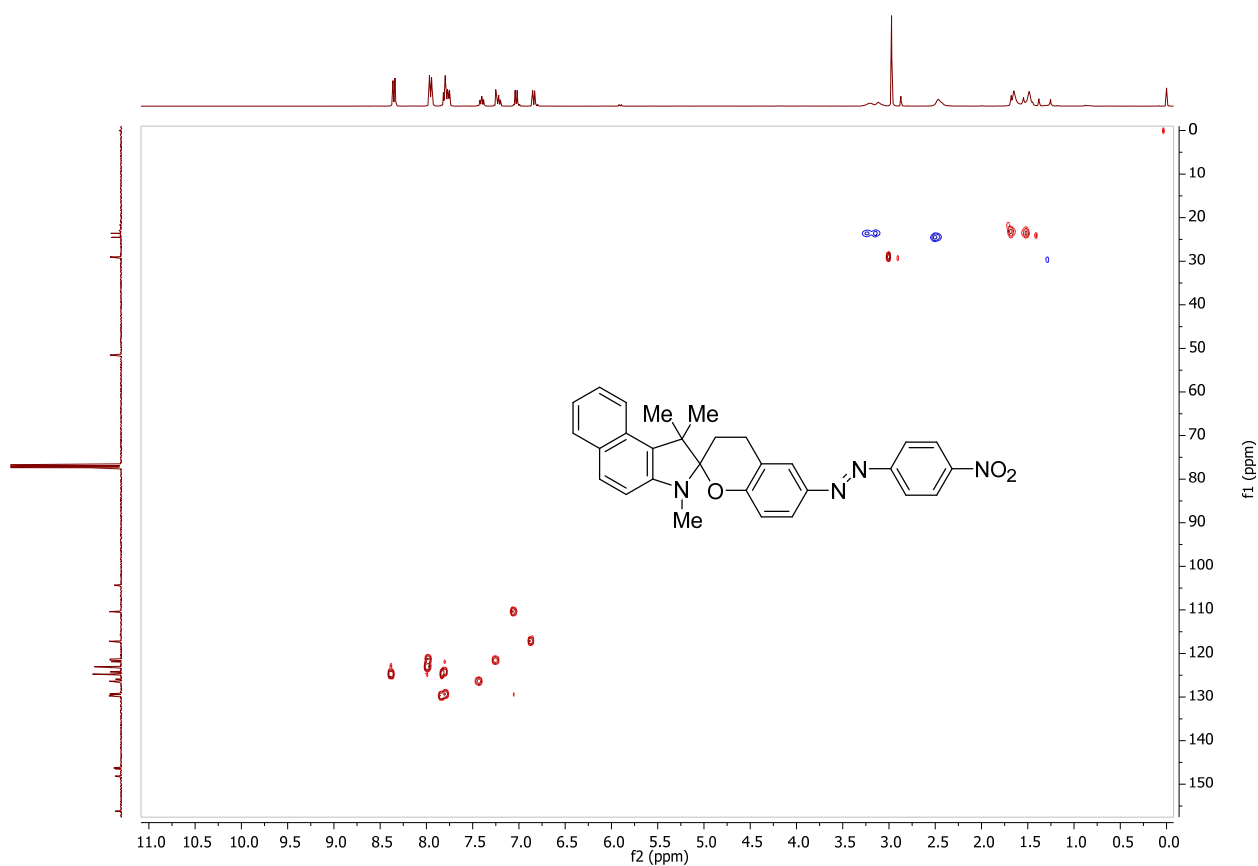

**Figure S16.**  $^1\text{H}$ - $^{13}\text{C}$  HSQC NMR of 1',1',3',4-tetramethyl-6-[(*E*)-4-(nitrophenyl)diazenyl]-1',3,3',4-tetrahydrospiro[chromene-2,2'-benz[e][2H]indole] (7e). ( $\text{CDCl}_3$ ).

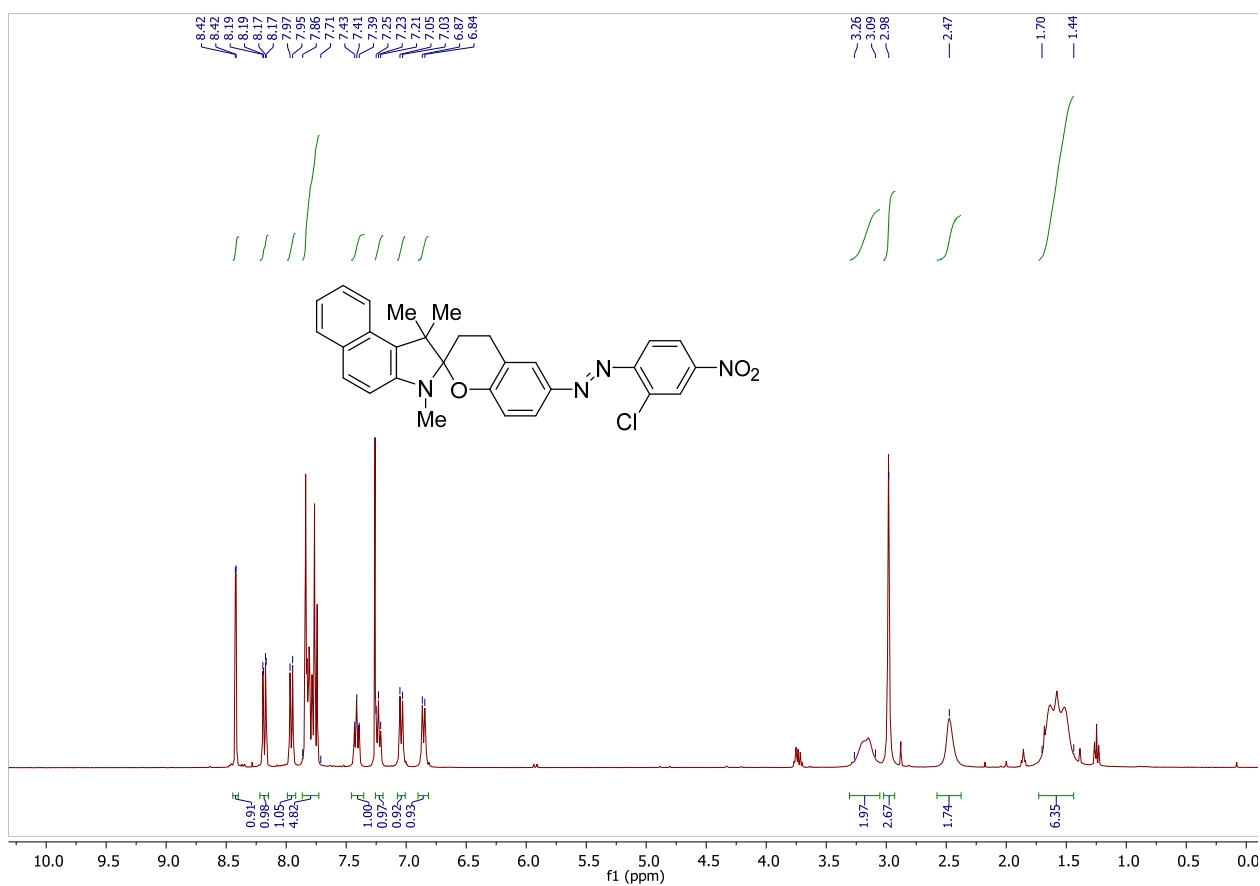

**Figure S17.** <sup>1</sup>H NMR of 6'-[(E)-(2-Chloro-4-nitrophenyl)diazenyl]-1',1',3',3'-trimethyl-1,3,3',4-tetrahydrospiro[chromene-2,2'-benz[e][2H]indole] (7f). (CDCl<sub>3</sub>).

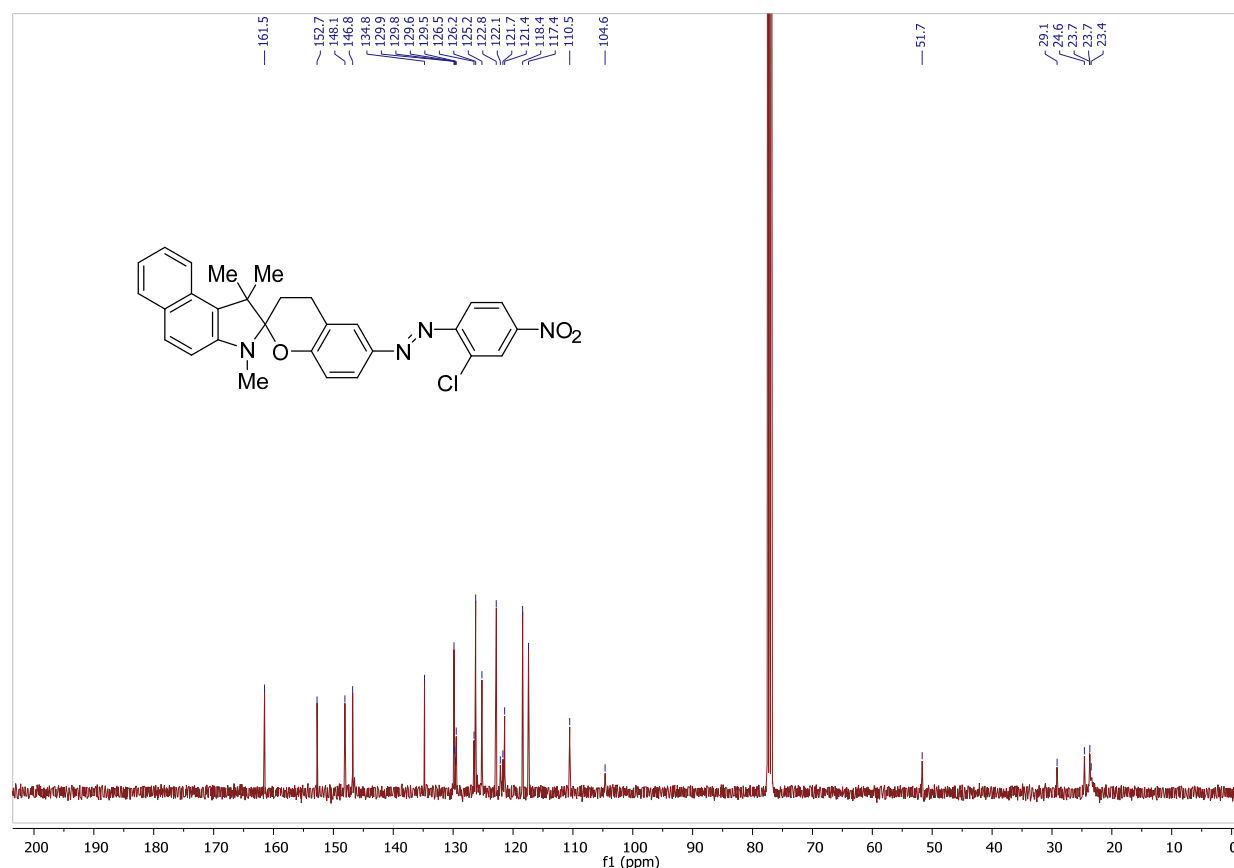

**Figure S18.**  $^{13}\text{C}$  NMR spectra of 6'-[(*E*)-(2-Chloro-4-nitrophenyl)diazenyl]-1',1',3'-trimethyl-1',3,3',4-tetrahydrospiro[chromene-2,2'-benz[e][2H]indole] (**7f**). ( $\text{CDCl}_3$ ).

**Table S1.** Data for plotting calibration curve.

| [CN $^-$ ] ( $\times 10^{-7}$ M) | Experiment 1<br>(A-A $_0$ ) | Experiment 2<br>(A-A $_0$ ) | Experiment 3<br>(A-A $_0$ ) | Average (A-A $_0$ ) | Positive error<br>value | Negative error<br>value |
|----------------------------------|-----------------------------|-----------------------------|-----------------------------|---------------------|-------------------------|-------------------------|
| 1.8                              | 0.0001                      | 0.0000                      | -0.0001                     | 0.0000              | 0.0001                  | 0.0001                  |
| 5.4                              | 0.0010                      | 0.0008                      | 0.0003                      | 0.0007              | 0.0003                  | 0.0004                  |
| 9                                | 0.0016                      | 0.0006                      | 0.0002                      | 0.0008              | 0.0008                  | 0.0006                  |
| 18                               | 0.0011                      | 0.0019                      | 0.0012                      | 0.0014              | 0.0005                  | 0.0002                  |
| 27                               | 0.0020                      | 0.0026                      | 0.0017                      | 0.0021              | 0.0005                  | 0.0004                  |
| 45                               | 0.0052                      | 0.0033                      | 0.0038                      | 0.0041              | 0.0011                  | 0.0003                  |
| 63                               | 0.0084                      | 0.0054                      | 0.0084                      | 0.0074              | 0.0010                  | 0.0020                  |
| 108                              | 0.0199                      | 0.0180                      | 0.0188                      | 0.0189              | 0.0010                  | 0.0009                  |
| 198                              | 0.0340                      | 0.0430                      | 0.0370                      | 0.0380              | 0.0050                  | 0.0010                  |
